# Supplementary material for: Connections between Water, Energy and Landscape: The Social Acceptance in the Monachil River Valley (South of Spain)
Source: MDPI journal article supplement (doi:10.3390/land11081203), 2022-07-30
Supplement: s1 [file s1]

## **Annex 1: Semi-Directive Interview Guide**

Summary presentation of the content of the interview (by the interviewers)

### **1. GENERAL PRESENTATION OF THE PERSON BEING INTERVIEWED**

1.1. Can you talk about your life in the river valley (Poqueira, Torrente, Monachil, Genil)?

Place of residence

How long have you lived here (date)? Why did you come here?

What elements or aspects of life here do you appreciate?

Does your family live here? Since when?

1.2. Could you talk about your position as a representative of the local power?

Date of election, hiring.

What is your position and what does your job consist of?

1.3. - What are, according to you, the main problems/challenges for your municipality today (facing this or that problem), the priorities of the moment and for the coming years?

1.4. - What are the latest initiatives you have carried out in your municipality, in collaboration with whom (which partners)?

### **2. THE DYNAMICS. TO UNDERSTAND THE EVOLUTION OF THE TERRITORY AND THE MAIN RESOURCES OF THE MUNICIPALITY.**

2.1 - Can you tell us about the most significant changes in your community and, more generally, in the valley? When and where did they take place (date, locate on the map)?

2.2 - How can you explain them and how do they translate into the landscape?

2.3. - What is the evolution of the agricultural/pastoral activity during these last years?

2.4. What are the main resources exploited? What percentage?

2.5. How would you improve your municipality? What are the elements without which it could not exist?

2.6. According to you, which existing resources in your municipality could be enhanced? By what means? Are there any projects being implemented or conceived?

2.7. Are there also projects (priorities) to improve the living environment of the inhabitants? What are the main expectations of the population? What would you like to improve?

2.8. What are the advantages of your municipality and what elements should be enhanced for both inhabitants and visitors? Locate them on the map.

### **3. THE RELATIONSHIP WITH THE LANDSCAPE (CHARACTERIZE THE LANDSCAPE FORMS).**

3.1. If you had to describe your community to someone who does not know it, what would you say?

3.2. What places in your community/town/city would you take a picture of to portray your municipality well? locate these emblematic places on the map.

3.3 What is your relationship with this community? Are you here often (to enjoy nature, its cultural riches, etc.) or do you go elsewhere? If so, where do you go?

### **4. WHAT ARE THE LANDSCAPES OF THE FUTURE?**

4.1. Which of the initiatives you have told us about will continue?

4.2. How do you imagine your valley in twenty years' time? What evolution would you like for your valley (positive, negative, optimistic...)?

4.3 What will be the problem areas and what will be the challenges?

### **5. THE QUESTION OF ENERGY**

5.1. What are the exploitable energy resources?

5.2. On what scale do they emerge and is it relevant to exploit them? Do you know of local initiatives in this sense that are already underway?

5.3. Are these resources articulated with other local projects related to tourism, agriculture, or environment? Is there any global project for this territory?

5.4. How is the exploitation of energy resources for local consumption articulated locally or are they primarily intended for the production of exportable energy?

5.5. What does the idea of energy transition sound like to you? What does energy transition mean to you?

5.6. What does it mean for this territory? Do you think that your territory has the potential to respond to this energy transition?

5.7. What are the factors that have led to the emergence of these projects and what are the obstacles to their implementation?

### **6. SOCIAL NETWORKS AND GROUPS**

6.1. To whom else would you recommend that we do the interview? (this question refers to the interview as a whole).

6.2. Is there anything else you would like to tell us, about your profession, your role, your valley?

### **Annex 2: Interview with Energy Transition in Mountain Areas 2018–2020**

#### **A. RELATIONSHIP WITH PLACE**

1. What does this valley mean to you?
2. What are the most significant changes you have observed / perceived in the municipality / valley landscape in recent years?
3. What do people live here?
4. What do you like most here?
5. How do you imagine the valley in 20 years?

#### **B. IN HOME - ENERGY HABITS:**

1. What kind of energy is used here in homes?
2. Could you estimate what proportion is electric and what is the heat?
3. What are we doing here to reduce energy demand and increase efficiency?
4. What means of transport does the population use?

#### **C. ENERGY TRANSITION**

1. What does energy transition mean to you?
2. What are the advantages / problems of conventional energies?
3. Is it favorable to the development of renewable energies?
4. Do you think they could be a solution to climate change? And a solution to ensure energy self-sufficiency?
5. What are the advantages? And its impacts?
6. Do your country's policies promote the development of RES?
7. Do you think that its development is possible everywhere or depends on the zones? What factors / impacts should be considered for its development?

#### **D. RENEWABLE ENERGY IN MY COMMUNITY**

1. What energy resources are there in your territory / region?
2. Do you live near an EERR factory? What's his name? What kind of energy does it generate?
3. What types of ERS do you think are most appropriate here in the municipality / valley? because?
4. Do you think it is better to develop large projects or small projects in the mountains? And in other places?
5. Is there a root / memory / local identity related to renewable energy projects in your area?
6. What are the barriers to RES development in your community / territory?
7. Do you think there are opportunities for their development?
8. Do you think that energy projects can compete with the use of local cross-cutting resources?
9. Who decides to put renewable energy projects here?
10. Do you ask people before putting them on?
11. Is the opinion of the people taken into account?
12. Did everyone agree with that? If no, how many disagreed? Why?

#### **E. SUSTAINABILITY OF EARTH**

1. Do you consider that the energy transition depends on existing technologies or innovative technologies that remain to be discovered?

2. Would it be necessary to change the economic model that would involve a change in the consumption and growth model?
3. Do you think the RHS contributes to the local economy? How much money do they contribute to the community? Give examples.
4. How many people from your city / region work in these facilities?
5. Is a new form of organization using more local / regional energy needed, or is the centralized model more efficient?
6. Would it be better for these projects to be managed by local cooperatives or public-private partnerships? Do you think there would be people willing to participate in these projects?
7. Do you have a specific proposal for this? How could it be articulated here?
8. Do you think that renewable technologies are clean? And recyclable?
9. Do you think that the external costs (environmental and social impacts of building wind turbines, solar panels, etc.) are lower than those of conventional energies?
10. Do you know where the EERR building materials come from?
11. Do you know if they are extracted responsibly / sustainably and what types of impact do they have?
12. Should the environmental and / or social impacts of extracting the materials needed for REE production be taken into account when installing these technologies or is the local economic benefit a priority?

#### **F. ENERGY LANDSCAPES**

1. Do you feel attached to this place?
2. What do you like more and what do you like less in this place?
3. If you want to describe this place to someone who does not know it, what would you say and what elements would you highlight?
4. Do you think that more renewable energy projects could be placed on this territory or is it already saturated?
5. Can energy projects alter / degrade the external image of their territory / region?
6. Do you prefer energy installations to be installed elsewhere?
7. Could you get used to seeing energy projects in your community? What kind of infrastructure do you like the least?
8. Could you talk about energy landscapes or do you think that energy projects can not generate landscapes?

### **Annex 3: Energy Transition Survey in Mountain Territories**

The following Survey is part of an International Research Project VEDETTE Verrous and Dynamic of Energy Transition in Mountain Territory AAP USMB VEDETTE developed between the EDYTEM Research Center belonging to the CNRS (Center National de la

Recherche Scientifique) and the Institute for Regional Development of the University of Granada. It will also be used to deal with the Energy Transition in Mountain Territories in the Research Project of the National Plan ADAPTATION TO THE ENERGY TRANSITION IN EUROPE: THE ENVIRONMENTAL, SOCIO-ECONOMIC AND CULTURAL ASPECTS. ADAPTAS, CSO2017-86975-R

Municipality: xxxx (Town names/village names)

#### A. RELATIONSHIP WITH THE PLACE

1. What are the most significant changes that you have noticed / perceived in XXX municipality/valley landscape in recent years?  
Mark one or several options with X.

##### A. RELATIONSHIP WITH THE PLACE

1. What are the most significant changes that you have noticed / perceived in XXX municipality/valley landscape in recent years? Mark one or several options with X.

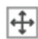

|                                                                          |  |
|--------------------------------------------------------------------------|--|
| Major urban changes                                                      |  |
| Changes for energy projects, power lines and transformation substations. |  |
| Changes for industrial projects                                          |  |
| Changes for public infrastructures                                       |  |
| Changes in the traditional image of the valley                           |  |
| Positive changes in the landscape                                        |  |
| Degradation of the landscape                                             |  |
| Others:                                                                  |  |

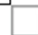

2. What is the source of live for local people?

|                        |  |
|------------------------|--|
| Agriculture, livestock |  |
| Crafts                 |  |
| Tourism                |  |
| Service sector         |  |
| Industry               |  |
| Others:                |  |

3. What do you value more in Monachil?

|                     |  |
|---------------------|--|
| The mountains       |  |
| The river and water |  |

|                                    |  |
|------------------------------------|--|
| The high mountain (glaciers, etc.) |  |
| People                             |  |
| The tranquility                    |  |
| The clean air                      |  |
| The weather                        |  |
| Nature and Landscape               |  |
| The village                        |  |
| The proximity of the city          |  |

4. How do you imagine the valley in 20 years?

|                                                 |  |
|-------------------------------------------------|--|
| The same as it is now                           |  |
| More care and more services for the population. |  |
| More sustainable ecologically and energetically |  |
| More urbanized                                  |  |
| With more industry                              |  |
| With more tourism                               |  |
| Others:                                         |  |

B. MY HOME - MY ENERGY USING HABITS:

5. What kind of energy do you use in your home?

|                                                                | Yes/No |
|----------------------------------------------------------------|--------|
| Electric heating                                               |        |
| Heating by fossil fuels (diesel, butane, propane, natural gas) |        |
| Heating by biomass (biomass boiler, fireplace)                 |        |
| Electric power for lighting operation, electrical appliances   |        |
| Air conditioning with electric power                           |        |
| Electric fans                                                  |        |
| Individual heating                                             |        |
| Central heating                                                |        |
| I don't know the origin of this energy                         |        |

6. What means do you use to reduce energy demand and increase energy efficiency?

|                                                                                                                                                                                                                                                      | <i>Sí/No</i> |
|------------------------------------------------------------------------------------------------------------------------------------------------------------------------------------------------------------------------------------------------------|--------------|
| Energy saving light bulbs (led)                                                                                                                                                                                                                      |              |
| Regulating thermal house-cave in winter and summer                                                                                                                                                                                                   |              |
| Windows with double glazing                                                                                                                                                                                                                          |              |
| I have installed solar energy panels (thermal or photovoltaic) at home.                                                                                                                                                                              |              |
| Wood floors, floating flooring, <del>islating</del> with wood or other materials ...                                                                                                                                                                 |              |
| In winter: I lift blinds/open shutters during the daytime and lower blinds/close shutters at night to take advantage of sunlight and conserve heat at night.<br>In summer: I use cross ventilation and lower blinds during daytime to keep the cool. |              |
| In winter: I wrap ourselves to be at home and for not having to heat my house too much.<br>In summer: I get undressed and cool myself with water to avoid putting the air conditioning.                                                              |              |
| Other (say which ones):                                                                                                                                                                                                                              |              |

7. What kind of transport do you use to get around?

|                                                            | <i>Sí/No</i> |
|------------------------------------------------------------|--------------|
| Private vehicle (car, motorcycle)                          |              |
| Public transport (bus, metro, train)                       |              |
| Electric transport                                         |              |
| Non-motorized means of transport (bicycle, walking, other) |              |

#### C. ENERGY TRANSITION

8. Check which of the following statements are related to the energy transition:

|                                                          |  |
|----------------------------------------------------------|--|
| Change of fossil fuels by renewable energies             |  |
| Use of energies that do not emit CO2 into the atmosphere |  |
| Electrification of energy demand                         |  |
| Decentralization of energy production and distribution   |  |

|                                                                                                                                                                                                |  |
|------------------------------------------------------------------------------------------------------------------------------------------------------------------------------------------------|--|
| Local populations have to appropriate their energy resources                                                                                                                                   |  |
| Connected energy self-sufficiency (the network supplies the energy needs when they <u>can not</u> be produced on a local scale and excess production is discharged into the grid). Net Balance |  |
| Energy self-sufficiency at the district / local level with the energy resources of the area.                                                                                                   |  |
| Reduction of energy demand                                                                                                                                                                     |  |
| Increase in energy efficiency                                                                                                                                                                  |  |
| Substitution of fossil fuels by nuclear energy that does not emit CO2 into the atmosphere.                                                                                                     |  |
| Education for the change of consumption habits                                                                                                                                                 |  |
| Involve the population of everything that is being done                                                                                                                                        |  |
| Other:                                                                                                                                                                                         |  |

9. What are the current benefits /negative impacts of conventional energies (coal, oil, natural gas, nuclear energy)?

|                    | It is a very cheap energy | It is easily manageable | It is a clean energy low in carbon | Generates polluting waste | It is insecure |
|--------------------|---------------------------|-------------------------|------------------------------------|---------------------------|----------------|
| Carbon             |                           |                         |                                    |                           |                |
| Oil and byproducts |                           |                         |                                    |                           |                |
| Natural gas        |                           |                         |                                    |                           |                |
| Nuclear energy     |                           |                         |                                    |                           |                |
| Hydroelectric      |                           |                         |                                    |                           |                |

10. Are you favorable to the development of renewable energy in general?

✗ yes

✗ no

11. What benefit / negative impacts can they cause, and of each of them in a particular way?

|                                      | Wind energy | Solar PV | Concentrated solar | Bioenergy |
|--------------------------------------|-------------|----------|--------------------|-----------|
| It is beneficial for the environment |             |          |                    |           |
| They hurt the birds                  |             |          |                    |           |
| Harm to aquatic ecosystems           |             |          |                    |           |
| Degrade the landscape                |             |          |                    |           |



|                                                                   |  |  |  |  |
|-------------------------------------------------------------------|--|--|--|--|
| They are harmful to the environment                               |  |  |  |  |
| They damage the local economy (they compete with other resources) |  |  |  |  |
| It is beneficial for society                                      |  |  |  |  |
| Economic benefits to companies                                    |  |  |  |  |
| Economic benefits governments                                     |  |  |  |  |
| It is a cheap energy                                              |  |  |  |  |
| It is a clean energy                                              |  |  |  |  |
| Economic benefits local communities                               |  |  |  |  |
| Generate local employment                                         |  |  |  |  |

12. Do the policies of your country enhance the development of renewable energies?

|                                                                                                             |  |
|-------------------------------------------------------------------------------------------------------------|--|
| There are policies and legislation that favour renewables energies                                          |  |
| The policies and legislation of my country make it difficult to develop renewable energy projects.          |  |
| The policies and legislation of my country slow down the development of Renewables Energies                 |  |
| The regulatory instability of my country generates insecurity for investments in renewable energy projects. |  |
| The administrative procedures are very complicated                                                          |  |
| There are incentives for the implementation of renewable energy                                             |  |

13. Do you think that its development is possible everywhere or it depends on the areas?

|                                                                                                                                                                                                    |  |
|----------------------------------------------------------------------------------------------------------------------------------------------------------------------------------------------------|--|
| They can be developed anywhere without previous studies.                                                                                                                                           |  |
| It is sufficient to carry out an Environmental Impact Study                                                                                                                                        |  |
| A Strategic Environmental Assessment is necessary: Each zone, its sensitivity and existing projects must be studied in order to take into account the possible cumulative and synergistic impacts. |  |
| There are areas with sensitive landscapes where NEAR projects should never be developed                                                                                                            |  |
| They <u>can not</u> be developed in National Parks or other sensitive natural spaces                                                                                                               |  |
| We must <u>take into account</u> the urban planning and constraints of each municipality and its populations.                                                                                      |  |

14. What factors / impacts of renewable energy should be taken into account for its development?

|                            | Wind power | Solar energy | Hydroelectric power | Biomass energy |
|----------------------------|------------|--------------|---------------------|----------------|
| Condition on the landscape |            |              |                     |                |

|                                             |  |  |  |  |
|---------------------------------------------|--|--|--|--|
| Affections on tourism                       |  |  |  |  |
| Competition with agriculture                |  |  |  |  |
| Competition with livestock                  |  |  |  |  |
| Negative effects on ecosystems              |  |  |  |  |
| Interference with other economic activities |  |  |  |  |
| Competition for transversal resources       |  |  |  |  |
| Actual costs of the project / Externalities |  |  |  |  |

#### D. RENEWABLE ENERGIES IN MY COMMUNITY

15. Did you know if there are renewable energy plants here? If yes, please specify their names?

\_\_\_\_\_

16. What energy resources are there in your territory / region?

|                                                         |  |
|---------------------------------------------------------|--|
| Rivers in which hydroelectric power plants could be put |  |
| Forest biomass (pruning remains, etc.)                  |  |
| Usable sun to obtain solar energy.                      |  |
| Usable wind to produce wind energy                      |  |

17. Do you live close to a renewable energy plant yourself?

✗ yes

✗ no

18. If yes, what is its name? \_\_\_\_\_ Which renewable energy source does it use? \_\_\_\_\_

Can you give an estimate how close you are to it: \_\_\_\_\_

19. Which renewable energies could be more suitable for development in XXX?

|                             |  |
|-----------------------------|--|
| Solar photovoltaic          |  |
| Solar thermal               |  |
| Wind power                  |  |
| Hydroelectricity            |  |
| Forest biomass              |  |
| Not renewable energy at all |  |

|              |  |
|--------------|--|
| I don't know |  |
|--------------|--|

20. Is it better for your community to develop large projects or small projects in mountain areas?

|                                      | In mountain areas | In other areas |
|--------------------------------------|-------------------|----------------|
| Large projects of renewable energies |                   |                |
| Small projects of renewable energies |                   |                |

21. Is there relation between your village/town and renewable energy projects?

|                                                                                                                                                                                       | Sí | No | I don't know |
|---------------------------------------------------------------------------------------------------------------------------------------------------------------------------------------|----|----|--------------|
| There are buildings / buildings and other objects related to renewable energy installations of historical / architectural interest (hydroelectric plants and dams, reservoirs, etc.). |    |    |              |
| There are facilities where guided tours are organized                                                                                                                                 |    |    |              |
| There are people from his village who worked in the construction of dams, renewable energy projects and installations, etc. and it is something that is part of our history.          |    |    |              |
| Access roads to renewable energy facilities are of great tourist interest for walkers and those interested in industrial tourism.                                                     |    |    |              |
| Access roads to renewable energy facilities are useful for local people, livestock, etc.                                                                                              |    |    |              |
| There is a rejection of renewable energy projects because of their impact on local environment and landscape.                                                                         |    |    |              |
| The population / municipalities want to recuperate the intangible energy heritage.                                                                                                    |    |    |              |
| Old projects are part of the local landscape                                                                                                                                          |    |    |              |

#### SUSTAINABILITY OF RENEWABLE ENERGIES

22. In your opinion, does TE go through innovative technologies that exist or are yet to be discovered? Would it go through a change in the economic model, of consumption, of growth?

|                                                       | Yes/No | Example |
|-------------------------------------------------------|--------|---------|
| Innovative technologies that exist                    |        |         |
| Innovative technologies that are yet to be discovered |        |         |
| Change of economic model                              |        |         |

22.b. Example:

23. Do renewable energies contribute to the local economy?

✕ yes

✕ no

24. How many people from your town work in these facilities?

|        |  |
|--------|--|
| Nobody |  |
| 1-5    |  |
| 5-10   |  |
| >10    |  |

25. In your opinion, are renewable energies technologies clean and recyclable technologies?

|                    | Yes | No |
|--------------------|-----|----|
| Clean technologies |     |    |
| Recyclable         |     |    |

26. Do you think that external costs (environmental impacts and social costs of the construction of turbines, solar panels, etc.) are lower than those of conventional energies?

|                | Lowest cost | Higher cost | Equal cost |
|----------------|-------------|-------------|------------|
| Manufacturing  |             |             |            |
| Energy storage |             |             |            |

27. Do you know where the construction materials of the renewables energies devices come from?

|               |  |
|---------------|--|
| Europe        |  |
| Africa        |  |
| Asia          |  |
| North America |  |
| South America |  |

28. Do you know if they are extracted in a responsible / sustainable manner and what kind of impacts do they have?

|                        | Yes / No | Environmental impacts | Social Impacts |
|------------------------|----------|-----------------------|----------------|
| Responsible extraction |          |                       |                |
| Sustainable            |          |                       |                |

29. Do the negative environmental and /or social impacts of extraction of the materials necessary for the production of renewable energies have to be taken into account when these technologies are installed?

|                                                                 | No impacts | Environmental impacts | Social impacts |
|-----------------------------------------------------------------|------------|-----------------------|----------------|
| We must take into account the external effects to the territory |            |                       |                |



- ✗ I came here more than 10 years ago
- ✗ I come here less than 10 years ago.
- ✗ I don't live here.

Do you have a place you feel particularly attached to in this area/region? If so, please state: \_\_\_\_\_

- |                |                                                                                          |       |      |
|----------------|------------------------------------------------------------------------------------------|-------|------|
| Place of work: | Do you work in Monachil valley?                                                          | ✗ yes | ✗ no |
|                |                                                                                          |       |      |
| Identity:      | Would you consider the place where you live your home?                                   | ✗ yes | ✗ no |
|                |                                                                                          |       |      |
| Memberships:   | Are you a member of an environmental organisation (WWF, Greenpeace, local organisation)? | ✗ yes | ✗ no |

Thank you very much for participating in our survey! We appreciate your contribution.
